# Supplementary material for: Bariatric Surgery Associates with Nonalcoholic Steatohepatitis/Hepatocellular Carcinoma Amelioration via SPP1 Suppression
Source: MDPI journal article supplement (doi:10.3390/metabo13010011), 2022-12-21
Supplement: s1 [file s1]

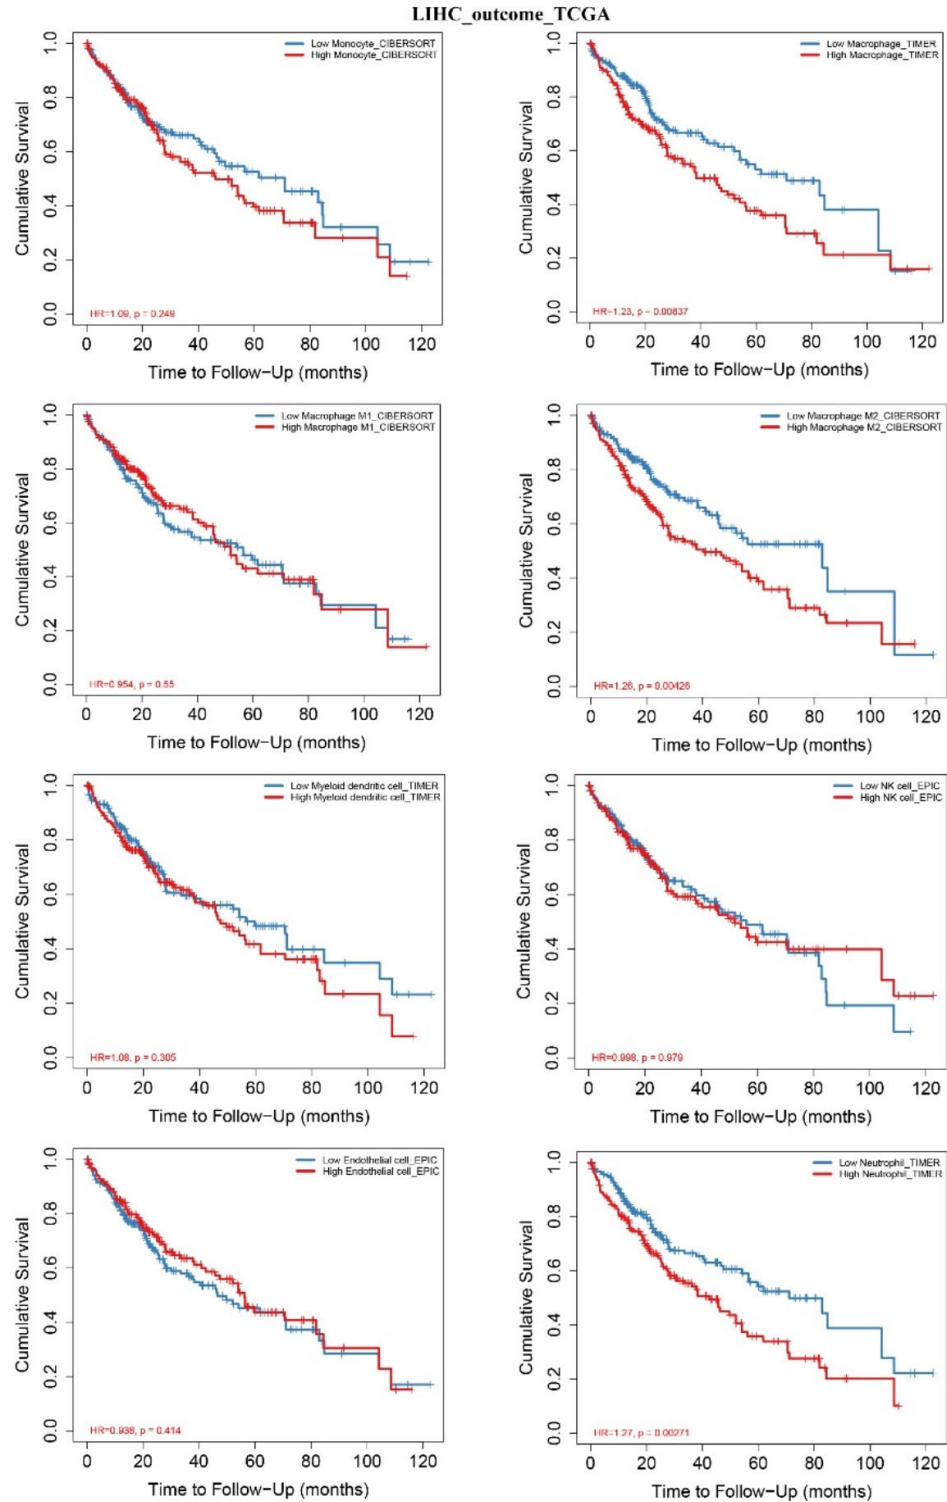

**Figure S2.** Immune cell infiltration analysis in LIHC (TCGA). Correlation of OS and 8 immune cell (monocyte, macrophage, M1 macrophage, M2 macrophage, DC, NK cell, endothelial cell and neutrophil) infiltration levels were analyzed in LIHC (TCGA) dataset.

**A**

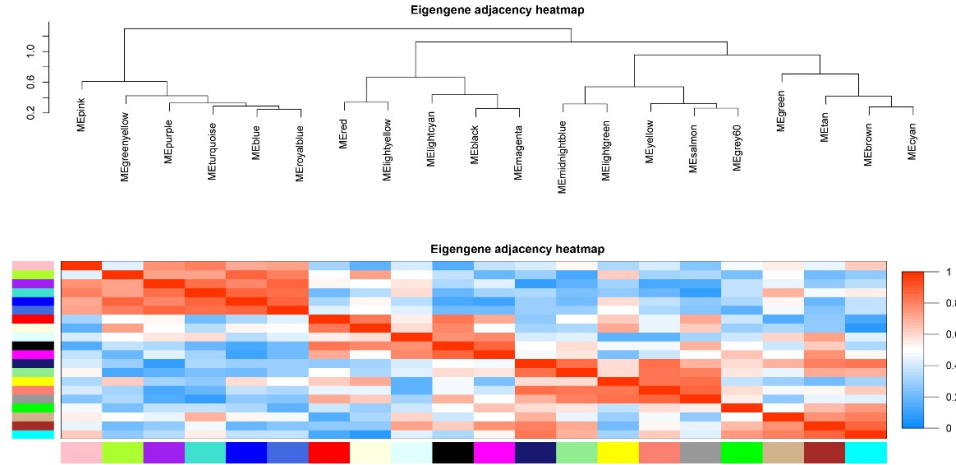

**B**

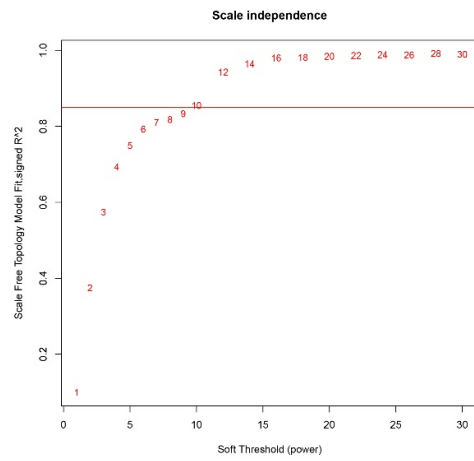

**C**

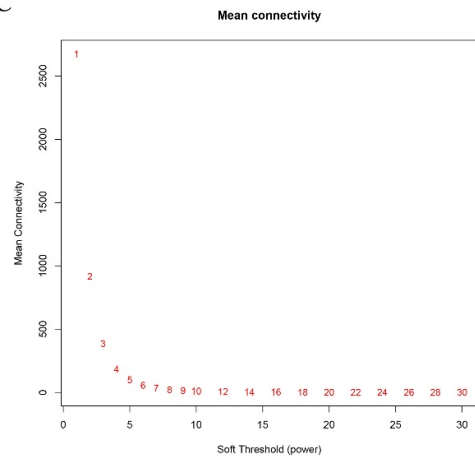

**D**

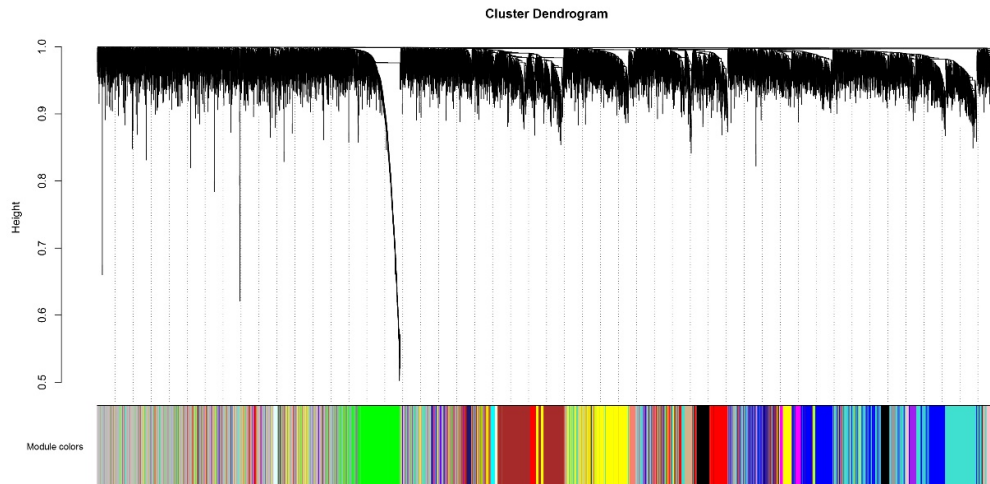

**Figure S3.** Within WGCNA, (A) Eigengene adjacency heatmap, (B) Scale independence, (C) Mean connectivity and (D) Cluster Dendrogram are display.

**Figure S4**

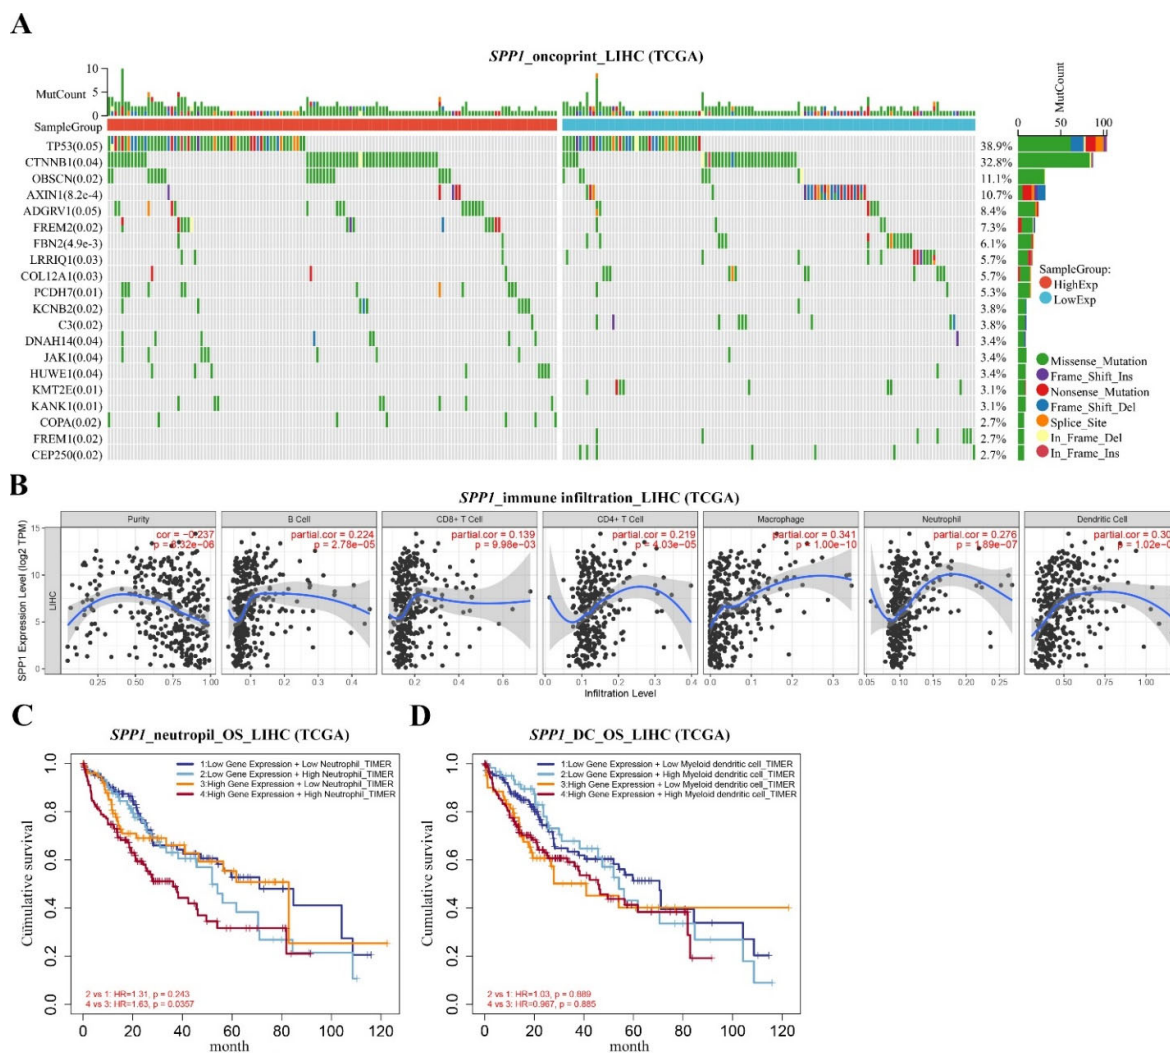

**Figure S4.** *SPP1* in LIHC (TCGA). (A) *SPP1* related gene mutation landscape was generated from LIHC (TCGA) dataset. (B) Correlations of *SPP1* expression and immune cell (B cell, CD8+ T cell, CD4+ T cell, macrophage, neutrophil and DC) infiltration levels were analyzed in LIHC (TCGA) dataset. Correlation of OS, *SPP1* expression and immune cell [(C) neutrophil and (D) DC] infiltration levels were analyzed in LIHC (TCGA) dataset.

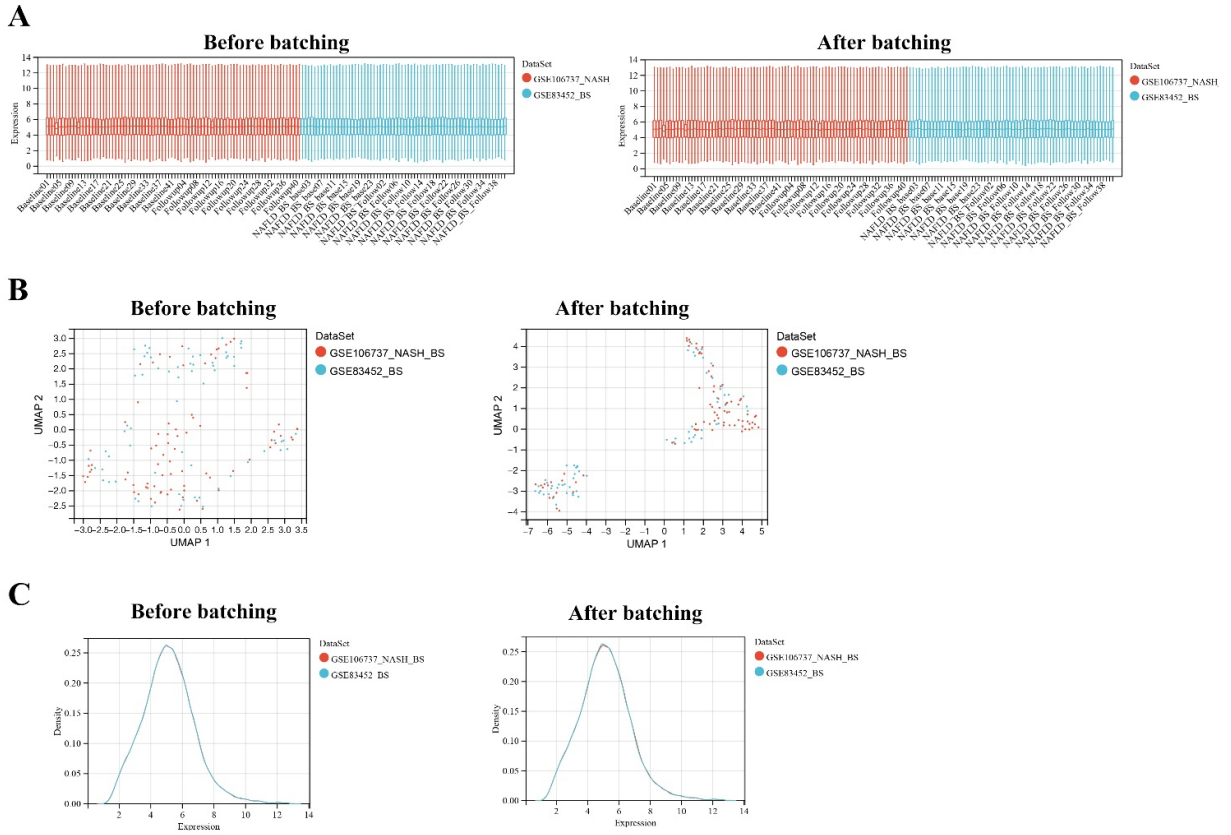

**Figure S5.** Raw data of GSE106737 and GSE83452 are merged. Batch effects are removed by the method of Johnson WE et al. Alterations of (A) gene expressions, (B) data densities and (C) UMAP are displayed as before vs. after batching.

**Table S1.** Data resource (bulk RNA-sequencing analysis).

| ID        | Samples                                            |  | Organism     | Tissue |
|-----------|----------------------------------------------------|--|--------------|--------|
|           | Status                                             |  |              |        |
| GSE83452  | NASH_BS: baseline (n=16), followup (n=16)          |  | Homo sapiens | Liver  |
|           | NASH_Diet: baseline (n=50), followup (n=20)        |  | Homo sapiens | Liver  |
| GSE106737 | NASH_BS: baseline (n=41), followup (n=41)          |  | Homo sapiens | Liver  |
| GSE164760 | Normal (n=6), NASH (n=74), NASH-derived HCC (n=53) |  | Homo sapiens | Liver  |
| GSE89632  | Normal (n=24), NASH (n=19)                         |  | Homo sapiens | Liver  |
| GSE63067  | Normal (n=7), NASH (n=9)                           |  | Homo sapiens | Liver  |
| GSE48452  | Normal (n=14), NASH (n=18)                         |  | Homo sapiens | Liver  |
| GSE49541  | Mild fibrosis (n=6), Advanced fibrosis (n=74)      |  | Homo sapiens | Liver  |
